# Supplementary material
Source: publisher site journal article supplement (https://www.dovepress.com/article/313309)
Supplement: Supplementary file 1 [file get_supplementary_file.php]

Supplementary File One: Retrospective health record review questions

| Question                                      | Answer option                                                                                                                                                                                                                                                                                                                                                                                                                                                                                                                                                                                                                                                                                                                                                                                                                                                                               |
|-----------------------------------------------|---------------------------------------------------------------------------------------------------------------------------------------------------------------------------------------------------------------------------------------------------------------------------------------------------------------------------------------------------------------------------------------------------------------------------------------------------------------------------------------------------------------------------------------------------------------------------------------------------------------------------------------------------------------------------------------------------------------------------------------------------------------------------------------------------------------------------------------------------------------------------------------------|
| <b>Demographics</b>                           |                                                                                                                                                                                                                                                                                                                                                                                                                                                                                                                                                                                                                                                                                                                                                                                                                                                                                             |
| Patient UR number                             | Integer entry                                                                                                                                                                                                                                                                                                                                                                                                                                                                                                                                                                                                                                                                                                                                                                                                                                                                               |
| Date of preadmission appointment              | DD/MM/YYYY                                                                                                                                                                                                                                                                                                                                                                                                                                                                                                                                                                                                                                                                                                                                                                                                                                                                                  |
| Date of surgery                               | DD/MM/YYYY                                                                                                                                                                                                                                                                                                                                                                                                                                                                                                                                                                                                                                                                                                                                                                                                                                                                                  |
| Surgical speciality                           | Radio buttons: <ul style="list-style-type: none"> <li>- General/Colorectal</li> <li>- Gynaecology</li> <li>- Gynaecology/oncology</li> <li>- Orthopaedics</li> <li>- Thoracic</li> <li>- Urology</li> <li>- Neurosurgery</li> </ul>                                                                                                                                                                                                                                                                                                                                                                                                                                                                                                                                                                                                                                                         |
| Procedure name                                | Radio buttons: <ul style="list-style-type: none"> <li>- Abdomino-perineal resection</li> <li>- Anterior resection</li> <li>- Bowel resection</li> <li>- Gastrectomy</li> <li>- Liver resection</li> <li>- Esophagectomy</li> <li>- Pancreatectomy</li> <li>- Splenectomy</li> <li>- Total Knee Replacement</li> <li>- Total Hip Replacement</li> <li>- Total shoulder replacement</li> <li>- Aortic aneurysm</li> <li>- Aorto-femoral bypass graft</li> <li>- Aorto-iliac bypass graft</li> <li>- Ilio-femoral bypass graft</li> <li>- Cystectomy</li> <li>- Nephrectomy</li> <li>- Prostatectomy</li> <li>- Lobectomy</li> <li>- Pneumonectomy</li> <li>- Abdominal Hysterectomy (gynaecology-oncology only)</li> <li>- Myomectomy/Omentectomy</li> <li>- Flap repair</li> <li>- Abdominoplasty</li> <li>- Pelvic exenteration</li> <li>- Neck Dissection</li> <li>- Laparotomy</li> </ul> |
| What was the treating consultants name?       | Text entry                                                                                                                                                                                                                                                                                                                                                                                                                                                                                                                                                                                                                                                                                                                                                                                                                                                                                  |
| <b>Preoperative assessment and treatment</b>  |                                                                                                                                                                                                                                                                                                                                                                                                                                                                                                                                                                                                                                                                                                                                                                                                                                                                                             |
| Were all preadmission bloods ordered?         | Radio buttons: <ul style="list-style-type: none"> <li>- Yes</li> <li>- No</li> </ul>                                                                                                                                                                                                                                                                                                                                                                                                                                                                                                                                                                                                                                                                                                                                                                                                        |
| When were the pre-admission bloods performed? | DD/MM/YYYY                                                                                                                                                                                                                                                                                                                                                                                                                                                                                                                                                                                                                                                                                                                                                                                                                                                                                  |

|                                                               |                                                                                                                                                                                                                                                                                                                                                                                                       |
|---------------------------------------------------------------|-------------------------------------------------------------------------------------------------------------------------------------------------------------------------------------------------------------------------------------------------------------------------------------------------------------------------------------------------------------------------------------------------------|
| Were anticoagulants/antiplatelets ceased?                     | Radio buttons:<br><ul style="list-style-type: none"> <li>- Yes</li> <li>- No</li> <li>- N/A</li> </ul>                                                                                                                                                                                                                                                                                                |
| If so, provide detail                                         | Text entry                                                                                                                                                                                                                                                                                                                                                                                            |
| What was the patient's haemoglobin level preoperatively?      | Integer entry<br>(if not available, to enter 0)                                                                                                                                                                                                                                                                                                                                                       |
| What was the patient's MCV?                                   | Integer entry<br>(if not available, to enter 0)                                                                                                                                                                                                                                                                                                                                                       |
| Iron studies including ferritin                               | Radio buttons:<br><ul style="list-style-type: none"> <li>- Yes</li> <li>- No</li> </ul>                                                                                                                                                                                                                                                                                                               |
| What was the ferritin level?                                  | Integer entry<br>(if not available, to enter 0)                                                                                                                                                                                                                                                                                                                                                       |
| What was transferrin saturation?                              | Integer entry<br>(if not available, to enter 0)                                                                                                                                                                                                                                                                                                                                                       |
| What was the patient's CRP?                                   | Integer entry<br>(if not available, to enter 0)                                                                                                                                                                                                                                                                                                                                                       |
| What was the EGFR?                                            | Integer entry<br>(if not available, to enter 0)                                                                                                                                                                                                                                                                                                                                                       |
| B12 & Folate                                                  | Radio buttons:<br><ul style="list-style-type: none"> <li>- Yes</li> <li>- No</li> </ul>                                                                                                                                                                                                                                                                                                               |
| What was the serum b12 level?                                 | Integer entry<br>(if not available, to enter 0)                                                                                                                                                                                                                                                                                                                                                       |
| What was the folate level?                                    | Integer entry<br>(if not available, to enter 0)                                                                                                                                                                                                                                                                                                                                                       |
| Based on the blood results, what was the patient's diagnosis? | Radio buttons:<br><ul style="list-style-type: none"> <li>- Insufficient information</li> <li>- Absolute iron deficiency</li> <li>- Suboptimal iron stores</li> <li>- Iron deficiency anaemia</li> <li>- Anaemia of inflammation</li> <li>- Non-iron deficiency anaemia</li> <li>- Iron deficiency anaemia and anaemia of inflammation</li> <li>- Normal – no further intervention required</li> </ul> |
| If treatment or intervention was needed, what was provided?   | Radio buttons<br><ul style="list-style-type: none"> <li>- Oral iron</li> <li>- IV iron</li> <li>- Erythropoietin</li> <li>- Blood</li> <li>- GP referral</li> <li>- Perioperative medicine referral</li> <li>- None</li> <li>- Other</li> </ul>                                                                                                                                                       |
| What was the dose of IV Iron/EPO/Blood?                       | Text entry                                                                                                                                                                                                                                                                                                                                                                                            |

|                                                                                 |                                                                                                                                                                                                                                                                                                                                                                                                                                           |
|---------------------------------------------------------------------------------|-------------------------------------------------------------------------------------------------------------------------------------------------------------------------------------------------------------------------------------------------------------------------------------------------------------------------------------------------------------------------------------------------------------------------------------------|
| If other, please specify                                                        | Text entry                                                                                                                                                                                                                                                                                                                                                                                                                                |
| <b>At the closest point before surgery, which blood results were available?</b> |                                                                                                                                                                                                                                                                                                                                                                                                                                           |
| When were these tests taken?                                                    | Radio buttons <ul style="list-style-type: none"> <li>- Day of surgery</li> <li>- Up to and including one week prior</li> <li>- Up to and including two weeks prior</li> <li>- Up to and including three weeks prior</li> <li>- Up to and including four weeks prior</li> <li>- Up to and including five weeks prior</li> <li>- Up to and including six weeks prior</li> <li>- Greater than six weeks prior</li> <li>- Not done</li> </ul> |
| What was the patient's haemoglobin level?                                       | Integer entry<br>(if not available, to enter 0)                                                                                                                                                                                                                                                                                                                                                                                           |
| What was the patient's MCV?                                                     | Integer entry<br>(if not available, to enter 0)                                                                                                                                                                                                                                                                                                                                                                                           |
| Iron studies including ferritin                                                 | Radio buttons: <ul style="list-style-type: none"> <li>- Yes</li> <li>- No</li> </ul>                                                                                                                                                                                                                                                                                                                                                      |
| What was the ferritin level?                                                    | Integer entry<br>(if not available, to enter 0)                                                                                                                                                                                                                                                                                                                                                                                           |
| What was transferrin saturation?                                                | Integer entry<br>(if not available, to enter 0)                                                                                                                                                                                                                                                                                                                                                                                           |
| What was the patient's CRP?                                                     | Integer entry<br>(if not available, to enter 0)                                                                                                                                                                                                                                                                                                                                                                                           |
| What was the EGFR?                                                              | Integer entry<br>(if not available, to enter 0)                                                                                                                                                                                                                                                                                                                                                                                           |
| B12 & Folate                                                                    | Radio buttons: <ul style="list-style-type: none"> <li>- Yes</li> <li>- No</li> </ul>                                                                                                                                                                                                                                                                                                                                                      |
| What was the serum b12 level?                                                   | Integer entry<br>(if not available, to enter 0)                                                                                                                                                                                                                                                                                                                                                                                           |
| What was the folate level?                                                      | Integer entry<br>(if not available, to enter 0)                                                                                                                                                                                                                                                                                                                                                                                           |
| Based on the blood results, what was the patient's diagnosis?                   | Radio buttons: <ul style="list-style-type: none"> <li>- Insufficient information</li> <li>- Absolute iron deficiency</li> <li>- Suboptimal iron stores</li> <li>- Iron deficiency anaemia</li> <li>- Anaemia of inflammation</li> <li>- Non-iron deficiency anaemia</li> <li>- Iron deficiency anaemia and anaemia of inflammation</li> <li>- Normal – no further intervention required</li> </ul>                                        |
| If treatment or intervention was needed, what was provided?                     | Radio buttons <ul style="list-style-type: none"> <li>- Oral iron</li> <li>- IV iron</li> </ul>                                                                                                                                                                                                                                                                                                                                            |

|                                                                       |                                                                                                                                                                                        |
|-----------------------------------------------------------------------|----------------------------------------------------------------------------------------------------------------------------------------------------------------------------------------|
|                                                                       | <ul style="list-style-type: none"> <li>- Erythropoietin</li> <li>- Blood</li> <li>- GP referral</li> <li>- Perioperative medicine referral</li> <li>- None</li> <li>- Other</li> </ul> |
| What was the dose of IV Iron/EPO/Blood?                               | Text entry                                                                                                                                                                             |
| If other, please specify                                              | Text entry                                                                                                                                                                             |
| <b>Assessment and treatment - intraoperatively</b>                    |                                                                                                                                                                                        |
| Did the patient receive tranexamic acid?                              | Radio buttons: <ul style="list-style-type: none"> <li>- Yes</li> <li>- No</li> <li>- N/A</li> </ul>                                                                                    |
| If available, please provide dates and dose of TXA                    | Text entry                                                                                                                                                                             |
| Was blood loss recorded?                                              |                                                                                                                                                                                        |
| What was the total estimated blood volume lost? (mL)                  |                                                                                                                                                                                        |
| Was cell salvage used?                                                |                                                                                                                                                                                        |
| If cell salvage was used, how much blood was returned to the patient? | Integer entry                                                                                                                                                                          |
| Were bloods taken intraoperatively?                                   | Radio buttons: <ul style="list-style-type: none"> <li>- Yes</li> <li>- No</li> </ul>                                                                                                   |
| What was the lowest Hb result intraoperatively?                       | Integer entry<br>(if not available, to enter 0)                                                                                                                                        |
| Was IV Iron given in theatre?                                         | Radio buttons: <ul style="list-style-type: none"> <li>- Yes</li> <li>- No</li> </ul>                                                                                                   |
| Was the patient transfused in theatre?                                | Radio buttons: <ul style="list-style-type: none"> <li>- Yes</li> <li>- No</li> </ul>                                                                                                   |
| How many units?                                                       | Radio buttons: <ul style="list-style-type: none"> <li>- 1</li> <li>- 2</li> <li>- 3</li> <li>- 4</li> <li>- More than four</li> </ul>                                                  |
| Was there evidence of haemodynamic or respiratory decompensation?     | Radio buttons: <ul style="list-style-type: none"> <li>- Yes</li> <li>- No</li> </ul>                                                                                                   |
| Was the patient reassessed between units?                             | Radio buttons: <ul style="list-style-type: none"> <li>- Yes</li> <li>- No</li> </ul>                                                                                                   |

| <b>Assessment and treatment - postoperatively</b>                             |                                                                                                                                                                                                                                                                                                           |
|-------------------------------------------------------------------------------|-----------------------------------------------------------------------------------------------------------------------------------------------------------------------------------------------------------------------------------------------------------------------------------------------------------|
| What was the patient's haemoglobin level postoperatively? (earliest possible) | Integer entry<br>(if not available, to enter 0)                                                                                                                                                                                                                                                           |
| What date was it taken?                                                       | DD/MM/YYYY                                                                                                                                                                                                                                                                                                |
| Based on the results, was further investigation needed?                       | Radio buttons:<br>- Yes<br>- No                                                                                                                                                                                                                                                                           |
| Were iron studies performed?                                                  | Radio buttons:<br>- Yes<br>- No<br>- N/A                                                                                                                                                                                                                                                                  |
| As a result of Hb and/or iron results what was the diagnosis?                 | Radio buttons:<br>- Insufficient information<br>- Absolute iron deficiency<br>- Suboptimal iron stores<br>- Iron deficiency anaemia<br>- Anaemia of inflammation<br>- Non-iron deficiency anaemia<br>- Iron deficiency anaemia and anaemia of inflammation<br>- Normal – no further intervention required |
| Is this patient receiving or have they received iron replacement?             | Radio buttons:<br>- Yes<br>- No<br>- Not specified<br>- Not applicable                                                                                                                                                                                                                                    |
| What was the treatment type?                                                  | Radio buttons:<br>- IV<br>- Oral                                                                                                                                                                                                                                                                          |
| Please state the date of the treatment                                        | DD/MM/YYYY                                                                                                                                                                                                                                                                                                |
| Was the patient assessed after treatment?                                     | Radio buttons:<br>- Yes- Full Blood Count<br>- Yes – Iron studies<br>- Yes – Full blood count and iron studies<br>- No                                                                                                                                                                                    |
| Was the patient discharged on oral iron?                                      | Radio buttons:<br>- Yes<br>- No<br>- N/A                                                                                                                                                                                                                                                                  |
| Did the patient receive a transfusion post-operatively?                       | Radio buttons:<br>- Yes<br>- No                                                                                                                                                                                                                                                                           |
| What was listed as the indication for the transfusion?                        | Text entry                                                                                                                                                                                                                                                                                                |
| If yes, how many units did they receive?                                      | Integer entry                                                                                                                                                                                                                                                                                             |
| What was the date of transfusion?                                             | DD/MM/YYYY                                                                                                                                                                                                                                                                                                |

|                                                                   |                                                 |
|-------------------------------------------------------------------|-------------------------------------------------|
| Was there evidence of haemodynamic or respiratory decompensation? | Radio buttons:<br>- Yes<br>- No                 |
| Was there reassessment between transfused units?                  | Radio buttons:<br>- Yes<br>- No                 |
| <b>Discharge and readmission questions</b>                        |                                                 |
| What was the Hb at discharge?                                     | Integer entry<br>(if not available, to enter 0) |
| What was the total length of stay? (days)                         | Integer entry                                   |
| Is there evidence of post-op infection?                           | Radio buttons:<br>- Yes<br>- No                 |
| Is there evidence of post-op VTE?                                 | Radio buttons:<br>- Yes<br>- No                 |
| Was the patient readmitted?                                       | Radio buttons:<br>- Yes<br>- No                 |
| What was the date of readmission?                                 | DD/MM/YYYY                                      |
| What was the hb at readmission?                                   | Integer entry<br>(if not available, to enter 0) |
| What was the reason for readmission?                              | Text entry                                      |
| Any other comments?                                               | Text entry                                      |

Supplementary File Two: Quantitative survey questions with free text field

| Question                                                                                                                                     | Answer option                                                                                                                                                                                                                                                                                                                                                                                                                                                                                                                                                                                       |
|----------------------------------------------------------------------------------------------------------------------------------------------|-----------------------------------------------------------------------------------------------------------------------------------------------------------------------------------------------------------------------------------------------------------------------------------------------------------------------------------------------------------------------------------------------------------------------------------------------------------------------------------------------------------------------------------------------------------------------------------------------------|
| <b>Demographics</b>                                                                                                                          |                                                                                                                                                                                                                                                                                                                                                                                                                                                                                                                                                                                                     |
| What is your role?                                                                                                                           | Dropdown <ul style="list-style-type: none"> <li>- Medical officer</li> <li>- Anaesthetist</li> <li>- Clinical Nurse Consultant</li> <li>- Preadmissions Nurse</li> <li>- Surgeon</li> <li>- Blood bank/Pathology lab</li> <li>- IV Iron infusion clinic nurse</li> <li>- Quality</li> <li>- Manager</li> </ul>                                                                                                                                                                                                                                                                                      |
| How long have you been in your role?                                                                                                         | Dropdown <ul style="list-style-type: none"> <li>- Less than one year</li> <li>- One to three years</li> <li>- Three to five years</li> <li>- Five to ten years</li> <li>- Over ten years</li> </ul>                                                                                                                                                                                                                                                                                                                                                                                                 |
| Which aspects of the preoperative anaemia and iron deficiency screening, evaluation and management pathway are you involved with delivering? | Checkbox <ul style="list-style-type: none"> <li>- Initial patient assessment</li> <li>- Test ordering</li> <li>- Test checking</li> <li>- Treatment ordering</li> <li>- Referral ordering</li> <li>- Provision of treatment</li> <li>- Nursing care</li> <li>- Patient education</li> <li>- Quality oversight</li> <li>- Other</li> </ul>                                                                                                                                                                                                                                                           |
| Which of the following are a component of preoperative anaemia and iron deficiency screening, evaluation and management?                     | <ul style="list-style-type: none"> <li>- Ordering a full blood count, iron study, CRP, b12 &amp; folate, U&amp;E at the earliest possible time before surgery.</li> <li>- Reviewing patient tests results to determine the type of anaemia (if any) and act accordingly</li> <li>- Ordering IV Iron for patients who have iron deficiency (with or without anaemia) and are having urgent major surgery</li> <li>- Suggesting the patient obtains oral iron supplementation where necessary</li> <li>- Following up to see if the patient treatment is working</li> <li>- Referral to GP</li> </ul> |

| <b>Acceptability of Intervention Measure (AIM)</b> |                                                                                                                                                                                                  |
|----------------------------------------------------|--------------------------------------------------------------------------------------------------------------------------------------------------------------------------------------------------|
| The PAIDSEM-P meets my approval.                   | Radio buttons:<br><ul style="list-style-type: none"> <li>- Completely disagree</li> <li>- Disagree</li> <li>- Neither agree nor disagree</li> <li>- Agree</li> <li>- Completely agree</li> </ul> |
| The PAIDSEM-P is appealing to me.                  | Radio buttons:<br><ul style="list-style-type: none"> <li>- Completely disagree</li> <li>- Disagree</li> <li>- Neither agree nor disagree</li> <li>- Agree</li> <li>- Completely agree</li> </ul> |
| I like the PAIDSEM-P                               | Radio buttons:<br><ul style="list-style-type: none"> <li>- Completely disagree</li> <li>- Disagree</li> <li>- Neither agree nor disagree</li> <li>- Agree</li> <li>- Completely agree</li> </ul> |
| I welcome the PAIDSEM-P.                           | Radio buttons:<br><ul style="list-style-type: none"> <li>- Completely disagree</li> <li>- Disagree</li> <li>- Neither agree nor disagree</li> <li>- Agree</li> <li>- Completely agree</li> </ul> |
| <b>Intervention Appropriateness Measure (IAM)</b>  |                                                                                                                                                                                                  |
| The PAIDSEM-P seems fitting.                       | Radio buttons:<br><ul style="list-style-type: none"> <li>- Completely disagree</li> <li>- Disagree</li> <li>- Neither agree nor disagree</li> <li>- Agree</li> <li>- Completely agree</li> </ul> |
| The PAIDSEM-P seems suitable.                      | Radio buttons:<br><ul style="list-style-type: none"> <li>- Completely disagree</li> <li>- Disagree</li> <li>- Neither agree nor disagree</li> <li>- Agree</li> <li>- Completely agree</li> </ul> |
| The PAIDSEM-P seems applicable.                    | Radio buttons:<br><ul style="list-style-type: none"> <li>- Completely disagree</li> <li>- Disagree</li> <li>- Neither agree nor disagree</li> <li>- Agree</li> <li>- Completely agree</li> </ul> |



|                                                                              |                                                                                                                                                                                                  |
|------------------------------------------------------------------------------|--------------------------------------------------------------------------------------------------------------------------------------------------------------------------------------------------|
| The PAIDSEM-P seems like a good match.                                       | Radio buttons:<br><ul style="list-style-type: none"> <li>- Completely disagree</li> <li>- Disagree</li> <li>- Neither agree nor disagree</li> <li>- Agree</li> <li>- Completely agree</li> </ul> |
| <b>Feasibility of Intervention Measure (FIM)</b>                             |                                                                                                                                                                                                  |
| The PAIDSEM-P seems implementable.                                           | Radio buttons:<br><ul style="list-style-type: none"> <li>- Completely disagree</li> <li>- Disagree</li> <li>- Neither agree nor disagree</li> <li>- Agree</li> <li>- Completely agree</li> </ul> |
| The PAIDSEM-P seems possible.                                                | Radio buttons:<br><ul style="list-style-type: none"> <li>- Completely disagree</li> <li>- Disagree</li> <li>- Neither agree nor disagree</li> <li>- Agree</li> <li>- Completely agree</li> </ul> |
| The PAIDSEM-P seems doable.                                                  | Radio buttons:<br><ul style="list-style-type: none"> <li>- Completely disagree</li> <li>- Disagree</li> <li>- Neither agree nor disagree</li> <li>- Agree</li> <li>- Completely agree</li> </ul> |
| The PAIDSEM-P seems easy to use.                                             | Radio buttons:<br><ul style="list-style-type: none"> <li>- Completely disagree</li> <li>- Disagree</li> <li>- Neither agree nor disagree</li> <li>- Agree</li> <li>- Completely agree</li> </ul> |
| <b>Patients who are screened, evaluated and managed using the PAIDSEM-P:</b> |                                                                                                                                                                                                  |
| Understand why the pathway is being used                                     | Radio buttons:<br><ul style="list-style-type: none"> <li>- Completely disagree</li> <li>- Disagree</li> <li>- Neither agree nor disagree</li> <li>- Agree</li> <li>- Completely agree</li> </ul> |
| Are happy to have the required tests                                         | Radio buttons:<br><ul style="list-style-type: none"> <li>- Completely disagree</li> <li>- Disagree</li> <li>- Neither agree nor disagree</li> <li>- Agree</li> <li>- Completely agree</li> </ul> |

|                                                                                                                   |                                                                                                                                                                                                  |
|-------------------------------------------------------------------------------------------------------------------|--------------------------------------------------------------------------------------------------------------------------------------------------------------------------------------------------|
| Are not significantly inconvenienced                                                                              | Radio buttons:<br><ul style="list-style-type: none"> <li>- Completely disagree</li> <li>- Disagree</li> <li>- Neither agree nor disagree</li> <li>- Agree</li> <li>- Completely agree</li> </ul> |
| Are better off since implementation                                                                               | Radio buttons:<br><ul style="list-style-type: none"> <li>- Completely disagree</li> <li>- Disagree</li> <li>- Neither agree nor disagree</li> <li>- Agree</li> <li>- Completely agree</li> </ul> |
| <b>Existing barrier mitigation</b>                                                                                |                                                                                                                                                                                                  |
| Do you feel that Mater has the required infrastructure in place to support the PAIDSEM-P?                         | Radio buttons:<br><ul style="list-style-type: none"> <li>- Completely disagree</li> <li>- Disagree</li> <li>- Neither agree nor disagree</li> <li>- Agree</li> <li>- Completely agree</li> </ul> |
| Do you feel that the intervention as delivered (coordinated by a nurse) is helpful to executing the PAIDSEM-P?    | Radio buttons:<br><ul style="list-style-type: none"> <li>- Completely disagree</li> <li>- Disagree</li> <li>- Neither agree nor disagree</li> <li>- Agree</li> <li>- Completely agree</li> </ul> |
| Do you feel that current funding arrangements support the use of the PAIDSEM-P?                                   | Radio buttons:<br><ul style="list-style-type: none"> <li>- Completely disagree</li> <li>- Disagree</li> <li>- Neither agree nor disagree</li> <li>- Agree</li> <li>- Completely agree</li> </ul> |
| Do you think there is good communication between the multidisciplinary team in regards to enacting the PAIDSEM-P? | Radio buttons:<br><ul style="list-style-type: none"> <li>- Completely disagree</li> <li>- Disagree</li> <li>- Neither agree nor disagree</li> <li>- Agree</li> <li>- Completely agree</li> </ul> |
| Do you think the use of PAIDSEM-P is seen as a priority in the context of perioperative patient care?             | Radio buttons:<br><ul style="list-style-type: none"> <li>- Completely disagree</li> <li>- Disagree</li> <li>- Neither agree nor disagree</li> <li>- Agree</li> <li>- Completely agree</li> </ul> |

|                                                                                          |                                                                                                                                                                                                  |
|------------------------------------------------------------------------------------------|--------------------------------------------------------------------------------------------------------------------------------------------------------------------------------------------------|
| Do you have sufficient resources for ongoing participation in the delivery of PAIDSEM-P? | Radio buttons:<br><ul style="list-style-type: none"> <li>- Completely disagree</li> <li>- Disagree</li> <li>- Neither agree nor disagree</li> <li>- Agree</li> <li>- Completely agree</li> </ul> |
| Do you have sufficient access to information about the PAIDSEM-P?                        | Radio buttons:<br><ul style="list-style-type: none"> <li>- Completely disagree</li> <li>- Disagree</li> <li>- Neither agree nor disagree</li> <li>- Agree</li> <li>- Completely agree</li> </ul> |
| Do you have any comments or suggestions regarding the PAIDSEM-P?                         | Text entry                                                                                                                                                                                       |
| Are you happy to be contacted about your responses?                                      | Radio buttons:<br><ul style="list-style-type: none"> <li>- Yes</li> <li>- No</li> </ul>                                                                                                          |
| Please leave your name here (if happy to be contacted):                                  | Text entry                                                                                                                                                                                       |
